# Supplementary material
Source: PubMed Central journal article supplement (PMC3855282)
Supplement: NIHMS529801-supplement-1_si_001.pdf [file NIHMS529801-supplement-1_si_001.pdf]

# **Structural Characterization of Gangliosides and Glycolipids via Ultraviolet Photodissociation Mass Spectrometry**

*John P. O'Brien and Jennifer S. Brodbelt\**

Department of Chemistry and Biochemistry  
The University of Texas at Austin  
1 University Station A5300  
Austin, TX, USA 78712

Correspondence to: Jennifer Brodbelt, [jbroadbelt@cm.utexas.edu](mailto:jbroadbelt@cm.utexas.edu)

Running title: Gangliosides via UVPD-MS

Supplemental materials include:

Structures of compounds.

CID, HCD and UVPD spectra of numerous gangliosides.

Tables of identified gangliosides

**LacCer(18:1/12:0) [M, 805.6]**  
N-(dodecanoyl)-1- $\beta$ -lactosyl-sphing-4-ene

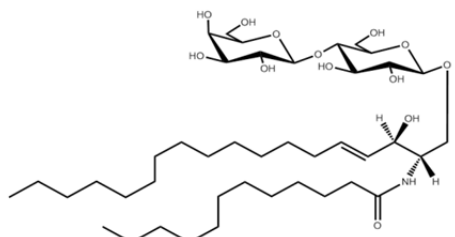

**GM3(18:1/23:0) [M, 1250.8]**  
NeuAc $\alpha$ 2-3Gal $\beta$ 1-4Glc $\beta$ -Cer(d18:1/23:0)

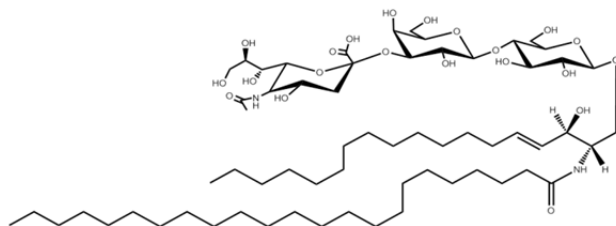

**GD1 (18:1/18:0) [M, 1837.0]**

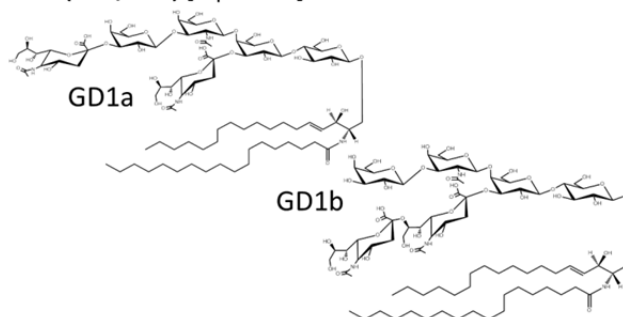

**GT1b(18:1/18:0) [M, 2128.0]**  
Gal $\beta$ 1-3GalNAc $\beta$ 1-4(NeuAc $\alpha$ 2-8NeuAc $\alpha$ 2-8NeuAc $\alpha$ 2-3)Gal $\beta$ 1-4Glc $\beta$ -Cer(d18:1/18:0)

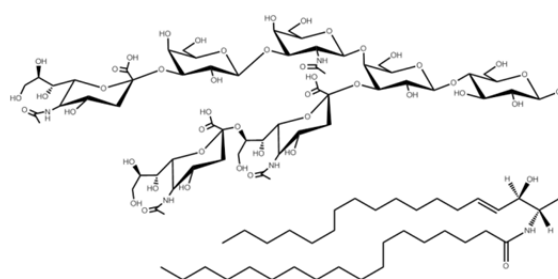

**Supplemental Figure 1.** Structures of gangliosides and glycosphingolipids. The ceramide structure is described in parenthesis by the total number of carbon atoms in sphingoid base chain and the number of double bonds in the chain, followed by the total number of carbon atoms in the fatty acid and number of double bonds in the chain. The monoisotopic molecular masses are shown in brackets.

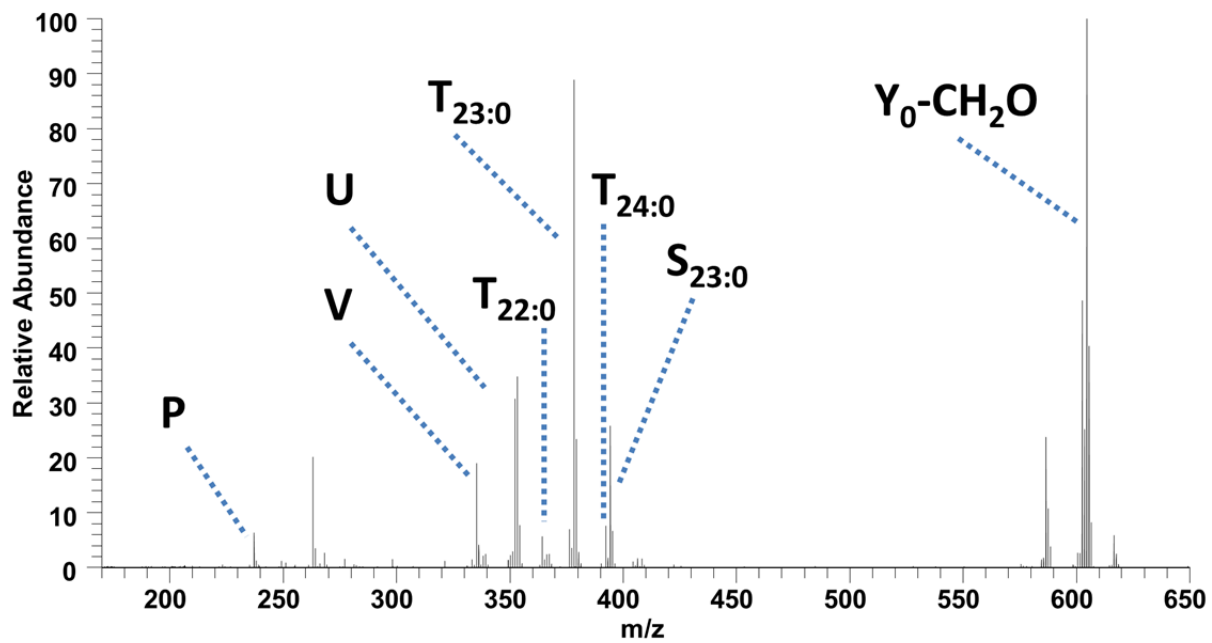

Supplemental Figure 2. CID-MS/MS/MS spectrum of GM3(18:1/23:0) Y<sub>0</sub> fragment ion.

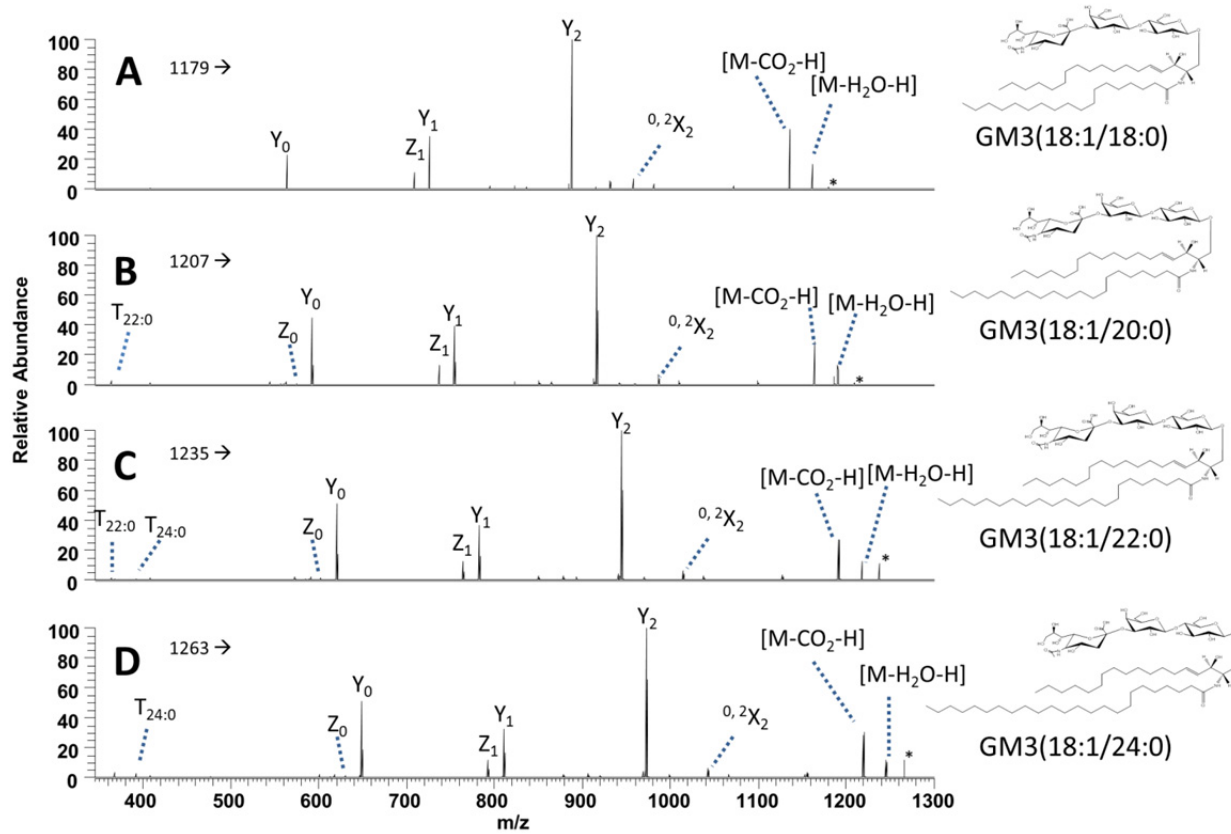

Supplemental Figure 3. CID mass spectra of singly deprotonated GM3 gangliosides with variable amide and sphingoid base lengths. The precursor ion is labelled with an asterisk.

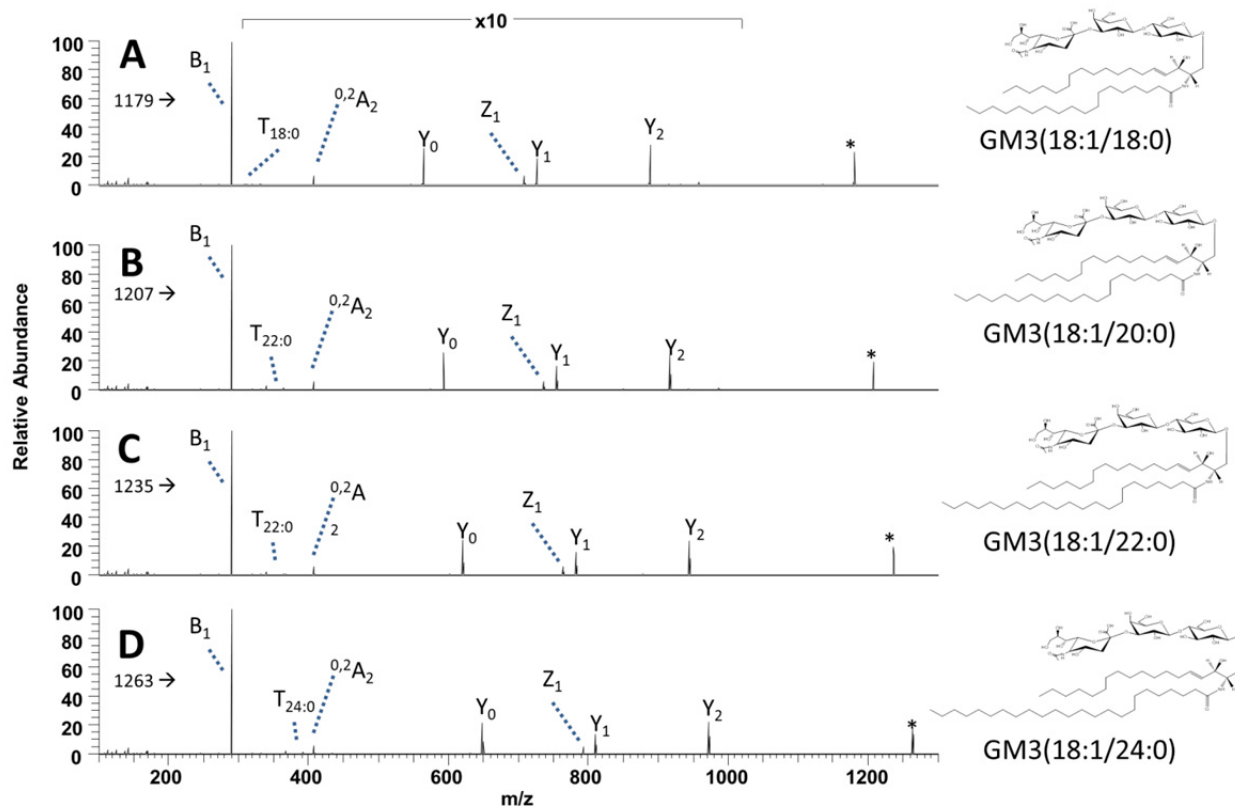

Supplemental Figure 4. HCD mass spectra of singly deprotonated GM3 gangliosides with variable amide and sphingoid base lengths. The precursor ion is labelled with an asterisk.

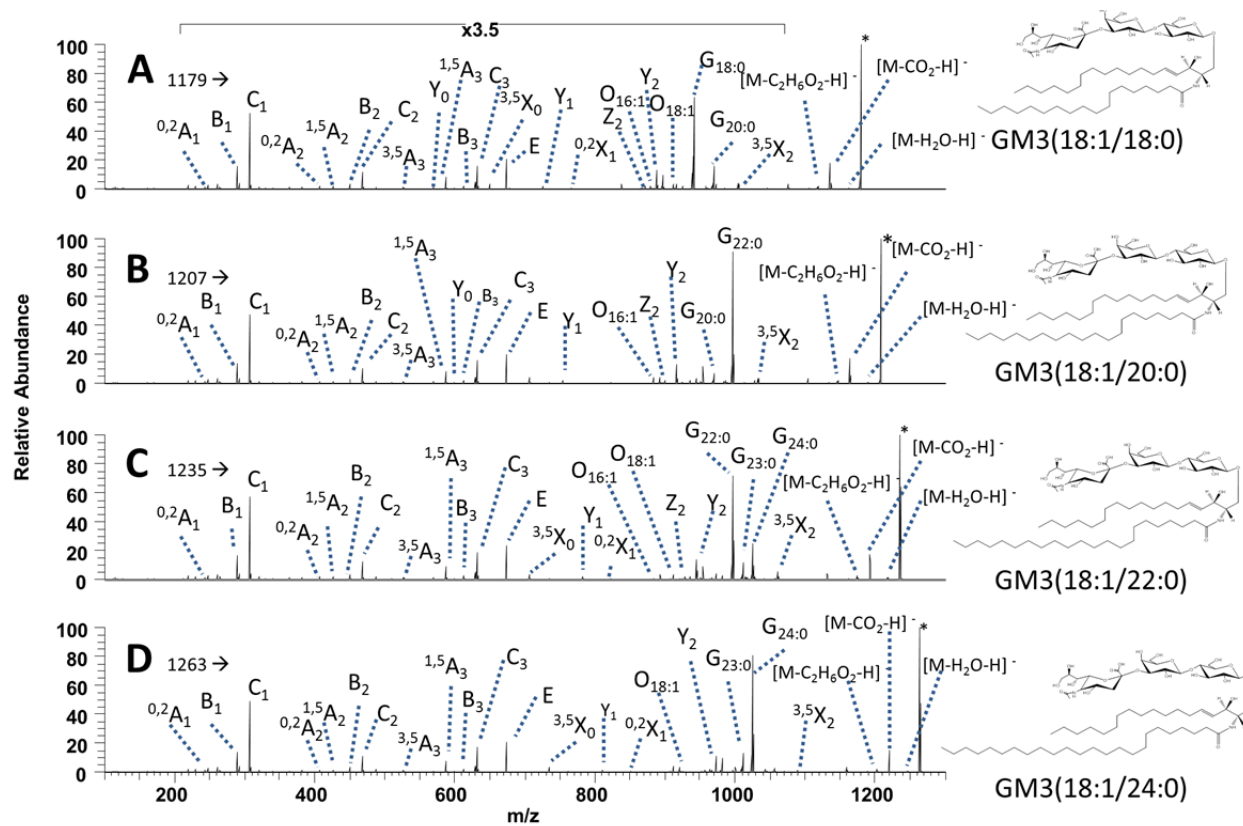

Supplemental Figure 5. UVPD mass spectra of singly deprotonated GM3 gangliosides with variable amide and sphingoid base lengths. The precursor ion is labelled with an asterisk.

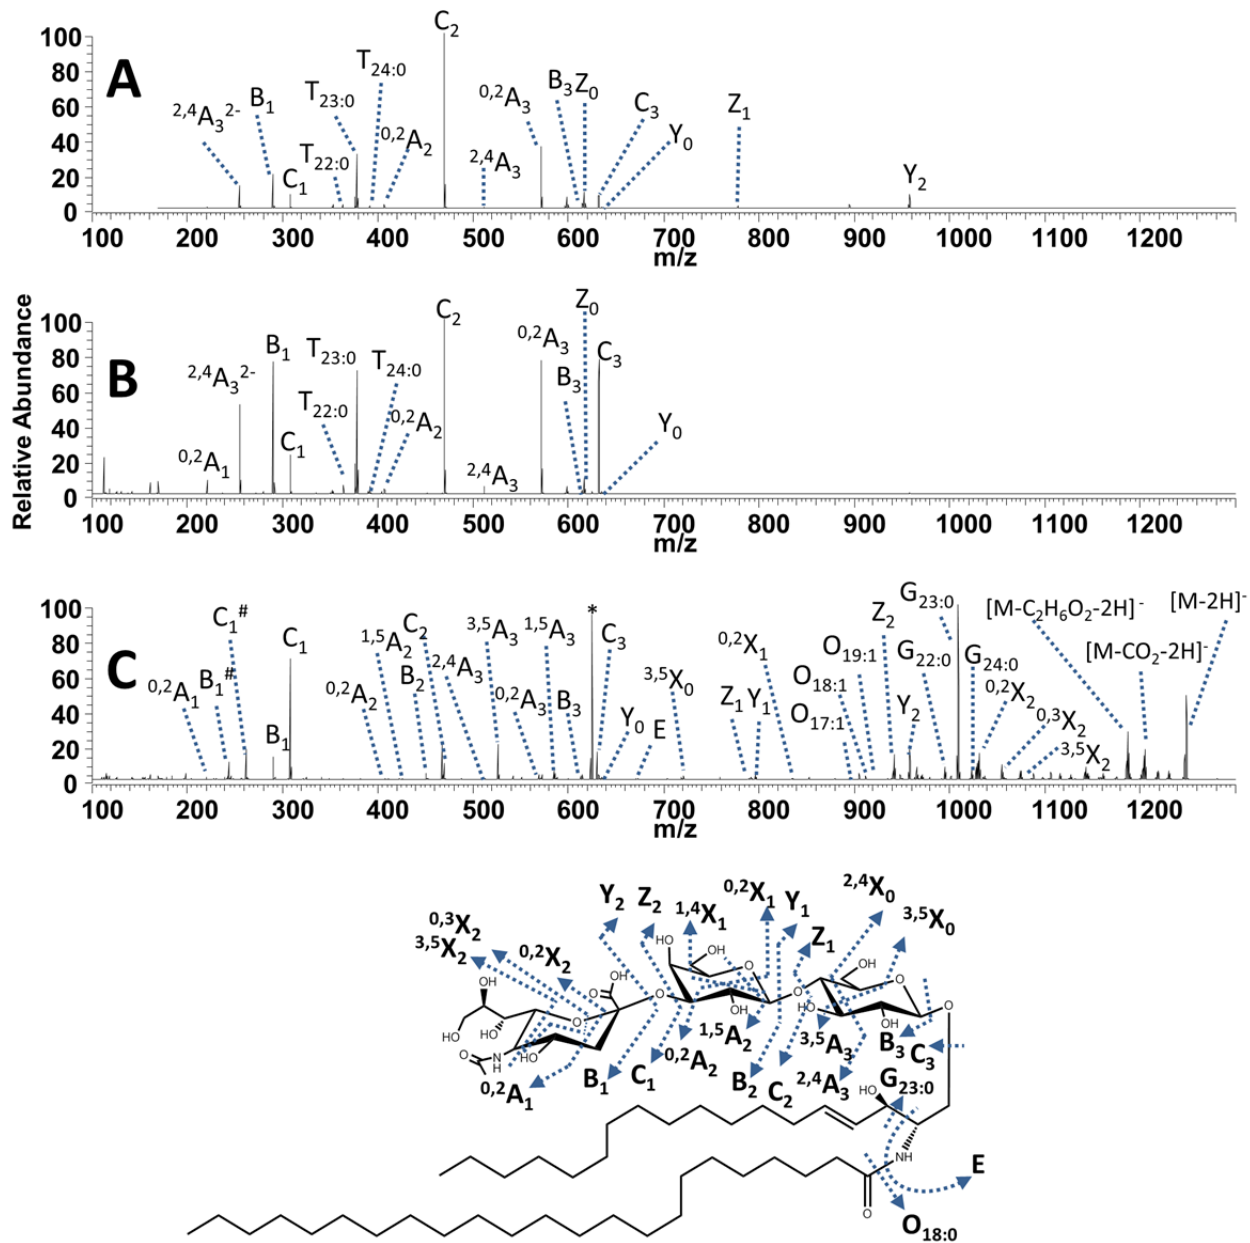

Supplemental Figure 6. (A) CID, (B) HCD and (C) UVPD mass spectra of the doubly deprotonated bovine milk ganglioside GM3(18:1/23:0). The precursor ion is labelled with an asterisk. Fragmentation maps are shown below the series of spectra. The m/z values of the fragment ions in C (UVPD) are summarized in Supplemental Table 1. The pound sign (#) indicates the loss of CO<sub>2</sub>.

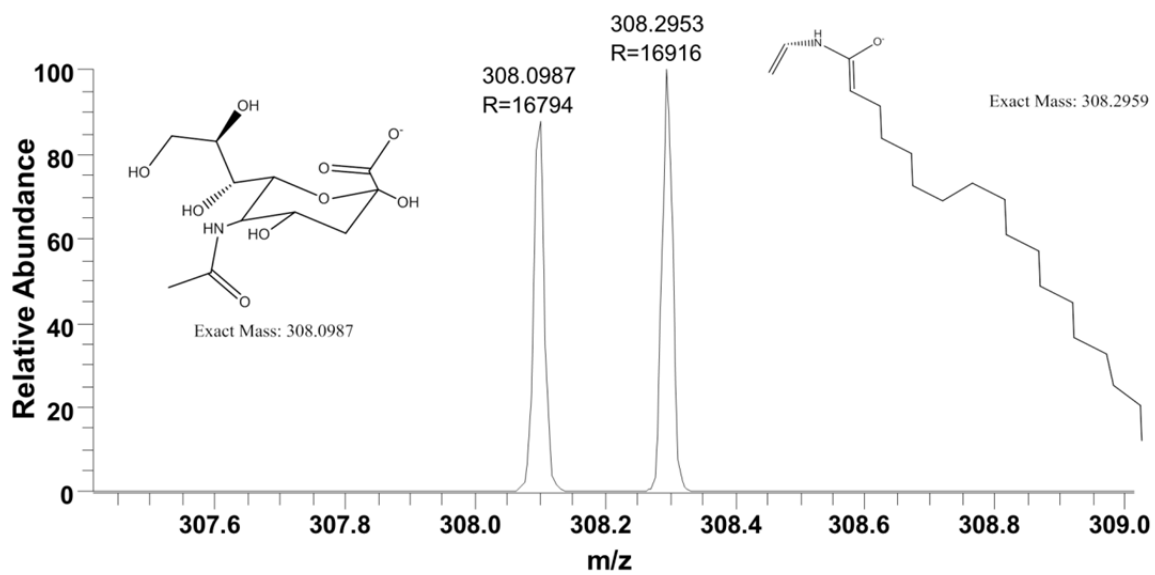

Supplemental Figure 7. Expanded region of HCD mass spectrum of singly charged GD1a(18:1/18:0) with the corresponding structures of the fragment ions.



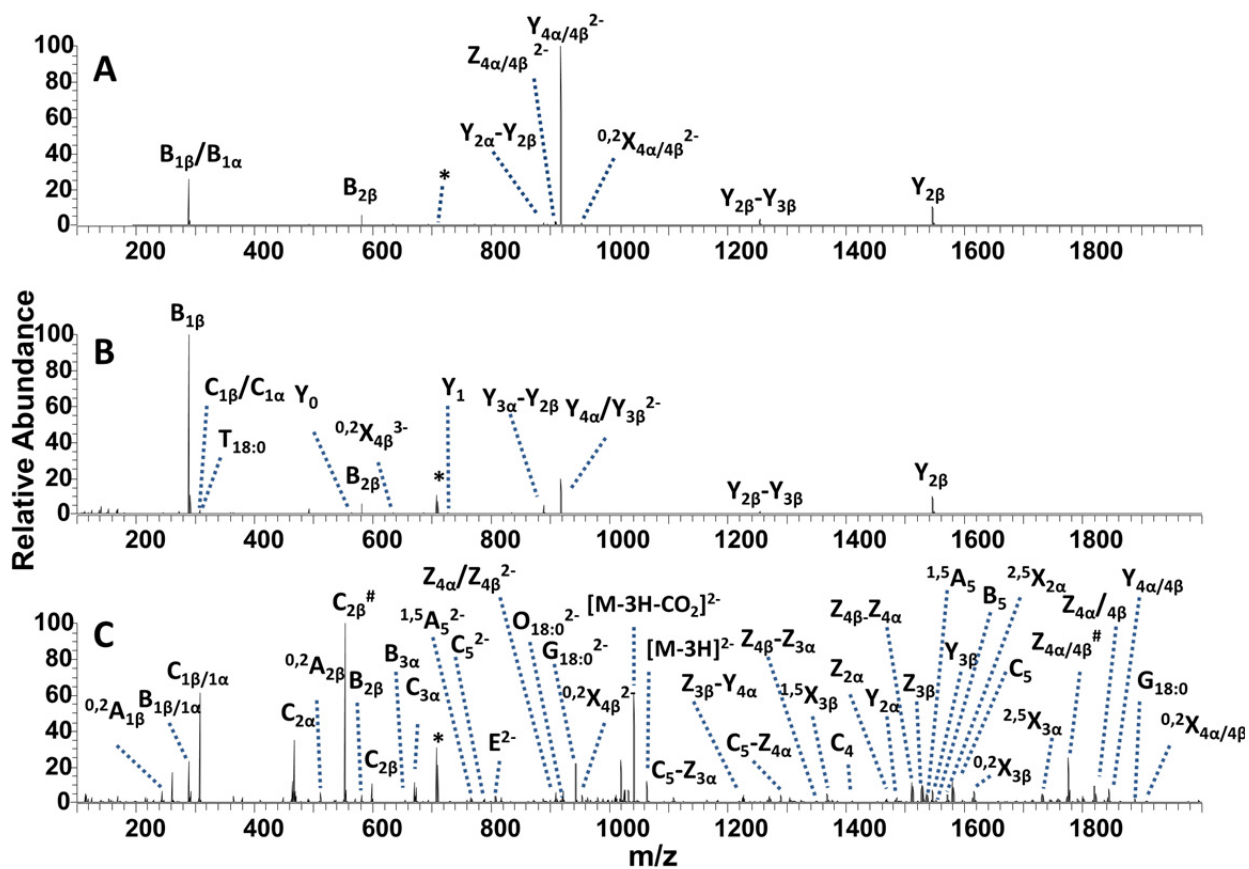

Supplemental Figure 8. (A) CID, (B) HCD and (C) UVPD mass spectra of the triply deprotonated porcine brain ganglioside GT1b(18:1/18:0). The precursor ion is labelled with an asterisk. The pound sign (#) indicates the loss of  $CO_2$ .

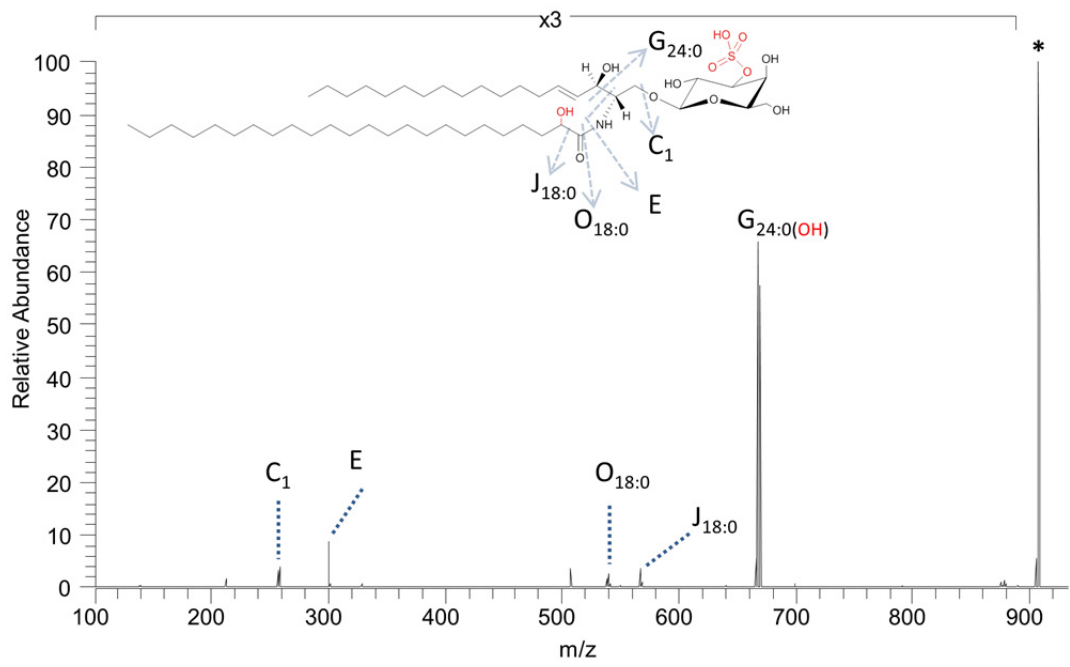

Supplemental Figure 9. LC-UVPD mass spectrum of singly charged (3'-sulfo)Gal $\beta$ -Cer(d18:1/24:0(2OH)) obtained from a porcine brain extract.

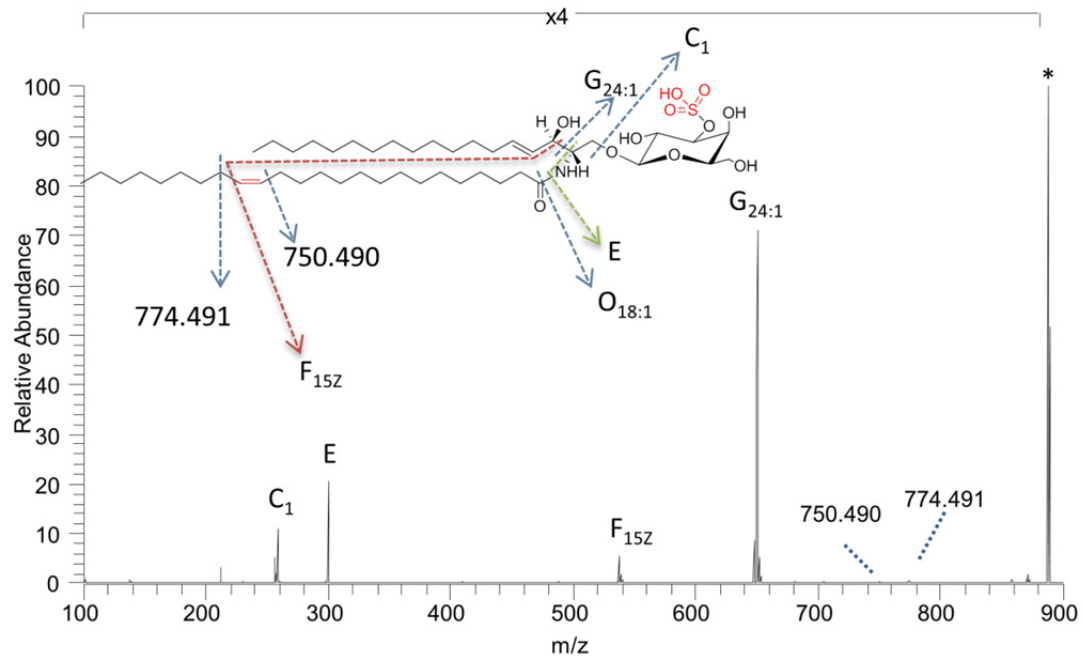

Supplemental Figure 10. LC-UVPD mass spectrum of singly deprotonated (3'-sulfo)Galβ-Cer(d18:1/24:1(15Z)) obtained from a porcine brain extract.

| Fragment Ion                                        | Expected Exact Mass | [M-H] <sup>-</sup> |             | [M-2H] <sup>2-</sup> |             | H-Migration      |
|-----------------------------------------------------|---------------------|--------------------|-------------|----------------------|-------------|------------------|
|                                                     |                     | Observed m/z       | error (ppm) | Observed m/z         | error (ppm) |                  |
| <b>Ceramide Fragment ions</b>                       |                     |                    |             |                      |             |                  |
| E                                                   | 673.231             | 673.231            | 0.0         | 673.23               | -1.5        |                  |
| O <sub>17:1</sub>                                   | 897.446             | 897.446            | 0.0         | 897.446              | 0.0         |                  |
| O <sub>18:1</sub>                                   | 911.462             | 911.461            | -1.1        | 911.459              | -3.3        |                  |
| O <sub>19:1</sub>                                   | 925.477             | 925.476            | -1.1        | 925.469              | -8.6        |                  |
| G <sub>22:0</sub>                                   | 997.570             | 997.571            | 1.0         | 995.553              | -1.4        | - H <sub>2</sub> |
| G <sub>23:0</sub>                                   | 1011.586            | 1011.586           | 0.0         | 1009.568             | -2.4        | - H <sub>2</sub> |
| G <sub>24:0</sub>                                   | 1025.601            | 1025.602           | 0.6         | 1023.583             | -2.7        | - H <sub>2</sub> |
| <b>Cross-Ring Fragment ions</b>                     |                     |                    |             |                      |             |                  |
| <sup>0,2</sup> A <sub>1</sub>                       | 220.083             | 220.083            | 0.0         | 220.082              | -4.5        |                  |
| <sup>0,2</sup> A <sub>2</sub>                       | 408.116             | 408.115            | -2.5        | 408.114              | -4.9        |                  |
| <sup>1,5</sup> A <sub>2</sub>                       | 426.162             | 426.162            | 0.0         | 426.161              | -2.3        |                  |
| <sup>2,4</sup> A <sub>3</sub>                       | 512.163             | 512.163            | -0.4        | 513.169              | -3.9        | + H              |
| <sup>3,5</sup> A <sub>3</sub>                       | 526.179             | 526.178            | -1.9        | 526.177              | -3.8        |                  |
| <sup>0,2</sup> A <sub>3</sub>                       | 570.169             | 570.168            | -1.8        | 570.167              | -3.5        |                  |
| <sup>1,5</sup> A <sub>3</sub>                       | 588.215             | 588.215            | 0.0         | 588.214              | -1.7        |                  |
| <sup>0,4</sup> X <sub>2</sub>                       | 1028.726            | 1028.726           | 0.0         | 1028.724             | -1.9        |                  |
| <sup>3,5</sup> X <sub>2</sub>                       | 1075.739            | 1075.738           | -0.9        | 1074.727             | -3.9        | - H              |
| <b>Glycosidic Fragment ions</b>                     |                     |                    |             |                      |             |                  |
| B <sub>1</sub>                                      | 290.088             | 290.089            | 3.4         | 290.088              | 0.0         |                  |
| C <sub>1</sub>                                      | 308.099             | 308.099            | 0.0         | 308.098              | -3.2        |                  |
| B <sub>2</sub>                                      | 451.134             | 451.133            | -2.2        | 451.133              | -2.2        |                  |
| C <sub>2</sub>                                      | 468.137             | 468.136            | -2.1        | 468.135              | -4.3        |                  |
| B <sub>3</sub>                                      | 613.187             | 613.186            | -1.6        | 613.185              | -3.3        |                  |
| C <sub>3</sub>                                      | 632.204             | 632.205            | 1.6         | 632.203              | -1.6        |                  |
| Z <sub>1</sub>                                      | 778.657             | 778.656            | -1.3        | 778.654              | -3.9        |                  |
| Y <sub>1</sub>                                      | 796.667             | 796.668            | 1.3         | 796.669              | 2.5         |                  |
| Z <sub>2</sub>                                      | 938.694             | 938.694            | 0.0         | 938.692              | -2.1        |                  |
| Y <sub>2</sub>                                      | 958.720             | 958.721            | 1.0         | 958.718              | -2.1        |                  |
| <b>Neutral Loss Product Ions</b>                    |                     |                    |             |                      |             |                  |
| [M-C <sub>2</sub> H <sub>6</sub> O <sub>2</sub> -H] | 1187.778            | 1187.775           | -2.9        | 1187.78              | 1.3         |                  |
| [M-H-CO <sub>2</sub> ]-                             | 1205.825            | 1205.826           | 0.5         | 1205.812             | -11.1       |                  |

Supplemental Table 1. UVPD fragment ions for singly deprotonated and doubly deprotonated ganglioside GM3 from Figure 3C and Supplemental Figure 6C.

| Identified Species                                                           | G/O Pairs                            | Observed m/z | Ion Charge | Theoretical m/z | Error (ppm) |
|------------------------------------------------------------------------------|--------------------------------------|--------------|------------|-----------------|-------------|
| <b>GQ1 Gangliosides</b>                                                      |                                      |              |            |                 |             |
| GQ1b(18:1/20:0)                                                              | G <sub>20:0</sub> /O <sub>18:1</sub> | 814.729      | 3-         | 814.724         | -6.1        |
| GQ1b(18:1/22:0)                                                              | G <sub>22:0</sub> /O <sub>18:1</sub> | 824.068      | 3-         | 824.072         | -4.9        |
| <b>GT1 Gangliosides</b>                                                      |                                      |              |            |                 |             |
| acyl-GT1b(d18:1/20:0)                                                        | G <sub>20:0</sub> /O <sub>18:1</sub> | 731.701      | 3-         | 731.696         | -6.8        |
| GT1b(18:1/18:0)                                                              | G <sub>18:0</sub> /O <sub>18:1</sub> | 708.353      | 3-         | 708.349         | -5.6        |
| GT1b(18:1/20:0)                                                              | G <sub>20:0</sub> /O <sub>18:1</sub> | 717.698      | 3-         | 717.692         | -8.4        |
| GT1b(18:1/21:0)                                                              | G <sub>21:0</sub> /O <sub>18:1</sub> | 722.358      | 3-         | 722.352         | -8.3        |
| GT1b(18:1/22:0)                                                              | G <sub>22:0</sub> /O <sub>18:1</sub> | 727.041      | 3-         | 727.036         | -6.9        |
| <b>GD1 Gangliosides</b>                                                      |                                      |              |            |                 |             |
| acyl-GD1b(d18:1/16:0)                                                        | G <sub>16:0</sub> /O <sub>18:1</sub> | 924.474      | 2-         | 924.468         | -6.5        |
| GD1a(18:1/18:0)*                                                             | G <sub>18:0</sub> /O <sub>18:1</sub> | 917.487      | 2-         | 917.479         | -8.7        |
| GD1b(18:1/18:0)*                                                             | G <sub>18:0</sub> /O <sub>18:1</sub> | 917.487      | 2-         | 917.479         | -8.7        |
| GD1a(18:1/19:0)*                                                             | G <sub>19:0</sub> /O <sub>18:1</sub> | 924.474      | 2-         | 924.468         | -6.5        |
| GD1a(19:1/18:0)*                                                             | G <sub>18:0</sub> /O <sub>19:1</sub> | 924.474      | 2-         | 924.468         | -6.5        |
| GD1a(18:1/20:0)*                                                             | G <sub>20:0</sub> /O <sub>18:1</sub> | 931.490      | 2-         | 931.494         | 4.3         |
| GD1b(18:1/20:0)*                                                             | G <sub>20:0</sub> /O <sub>18:1</sub> | 931.490      | 2-         | 931.494         | 4.3         |
| GD1a(20:1/18:0)*                                                             | G <sub>18:0</sub> /O <sub>20:1</sub> | 931.490      | 2-         | 931.494         | 4.3         |
| GD1b(20:1/18:0)*                                                             | G <sub>18:0</sub> /O <sub>20:1</sub> | 931.490      | 2-         | 931.494         | 4.3         |
| GalNAcβ1-4(NeuAcα2-3)Galβ1-3GalNAcβ1-4(NeuAcα2-3)Galβ1-4Glcβ-Cer(d18:1/18:0) | G <sub>18:0</sub> /O <sub>18:1</sub> | 1019.025     | 2-         | 1019.019        | -5.9        |
| Fuα1-2Galβ1-3GalNAcβ1-4(NeuAcα2-8NeuAcα2-3)Galβ1-4Glcβ-Cer(d18:1/18:0)       | G <sub>18:0</sub> /O <sub>18:1</sub> | 990.514      | 2-         | 990.508         | -6.1        |
| GalNAcβ1-4(NeuAcα2-3)Galβ1-3GalNAcβ1-4(NeuAcα2-3)Galβ1-4Glcβ-Cer(d18:1/20:0) | G <sub>20:0</sub> /O <sub>18:1</sub> | 1033.042     | 2-         | 1033.034        | -7.7        |
| <b>GD3 Gangliosides</b>                                                      |                                      |              |            |                 |             |
| acyl-GD3(d18:1/18:0)                                                         | G <sub>18:0</sub> /O <sub>18:1</sub> | 1512.852     | 1-         | 1512.843        | -5.9        |
| GD3(d18:1/18:0)                                                              | G <sub>18:0</sub> /O <sub>18:1</sub> | 1470.841     | 1-         | 1470.833        | -5.4        |
| <b>GM1 Gangliosides</b>                                                      |                                      |              |            |                 |             |
| GM1a(18:1/16:0)                                                              | G <sub>16:0</sub> /O <sub>18:1</sub> | 1516.845     | 1-         | 1516.838        | -4.6        |
| GM1a(18:1/18:0)                                                              | G <sub>18:0</sub> /O <sub>18:1</sub> | 1544.878     | 1-         | 1544.869        | -5.8        |
| GM1a(18:1/20:0)*                                                             | G <sub>20:0</sub> /O <sub>18:1</sub> | 1572.911     | 1-         | 1572.901        | -6.4        |
| GM1a(20:1/18:0)*                                                             | G <sub>18:0</sub> /O <sub>20:1</sub> | 1572.911     | 1-         | 1572.901        | -6.4        |
| Fuα1-2Galβ1-3GalNAcβ1-4(NeuAcα2-3)Galβ1-4Glcβ-Cer(d20:1/18:0)*               | G <sub>18:0</sub> /O <sub>20:1</sub> | 1718.967     | 1-         | 1718.959        | -4.7        |
| Fuα1-2Galβ1-3GalNAcβ1-4(NeuAcα2-3)Galβ1-4Glcβ-Cer(d18:1/20:0)*               | G <sub>20:0</sub> /O <sub>18:1</sub> | 1718.967     | 1-         | 1718.959        | -4.7        |

Supplemental Table 2. Major porcine gangliosides identified via LC-UVPD-MS corresponding to the chromatogram in Figure 5. Gangliosides labelled with an asterisk indicate that the specific species was elucidated by UVPD for co-eluting species

| Sulfotide Species                           | Fragment Ion Series                                     | Observed m/z | Ion Charge | Theoretical m/z | Error (ppm) |
|---------------------------------------------|---------------------------------------------------------|--------------|------------|-----------------|-------------|
| (3'-sulfo)Gal $\beta$ -Cer(d18:1/20:0)      | G <sub>20:0</sub> /O <sub>18:1</sub>                    | 834.583      | 1-         | 834.577         | -7.2        |
| (3'-sulfo)Gal $\beta$ -Cer(d18:1/24:1(15Z)) | G <sub>24:1</sub> /O <sub>18:1</sub> /K <sub>157</sub>  | 888.63       | 1-         | 888.624         | -6.8        |
| (3'-sulfo)Gal $\beta$ -Cer(d18:0/24:0(2OH)) | G <sub>24:0</sub> /O <sub>18:1</sub> /J <sub>18:0</sub> | 906.641      | 1-         | 906.635         | -6.6        |

Supplemental Table 3. Porcine sulfotides identified via LC-UVPD-MS corresponding to the chromatogram in Figure 5.
